# Supplementary material
Source: PubMed Central journal article supplement (PMC9358775)
Supplement: NIHMS1823525-supplement-Supplementary_Info.pdf [file NIHMS1823525-supplement-Supplementary_Info.pdf]

**Supplementary Table 1**

| Protein construct                      | Residues | Mutations         | Vector   | Figures |               |
|----------------------------------------|----------|-------------------|----------|---------|---------------|
|                                        |          |                   |          | Main    | Extended Data |
| <b>PLS1</b>                            |          |                   |          |         |               |
| PLS1 <sub>WT</sub> -mEmerald           | 1-629    | N/A               | pcDNA3.1 | 6       | 6             |
| <b>PLS2</b>                            |          |                   |          |         |               |
| FL <sub>PLS2</sub> /PLS2 <sub>WT</sub> | 1-627    | N/A               | pColdTEV | 1, 3, 5 | 3, 5          |
| ABD1 <sub>PLS2</sub>                   | 87-379   | N/A               | pColdTEV | 1, 2, 5 | 2             |
| ABD2 <sub>PLS2</sub>                   | 380-627  | N/A               | pColdTEV | 1, 2    | 1, 2          |
| RD-ABD1 <sub>PLS2</sub>                | 1-379    | N/A               | pColdTEV | 2       |               |
| PLS2 <sub>S5D</sub>                    | 1-627    | S5D               | pColdTEV | 3, 5    |               |
| PLS2 <sub>L475P</sub>                  | 1-627    | L475P             | pColdTEV | 3, 5    | 3             |
| PLS2 <sub>S406E</sub>                  | 1-627    | S406E             | pColdTEV | 5       | 5             |
| ABD2 <sub>S406E</sub>                  | 380-627  | S406E             | pColdTEV | 5       |               |
| PLS2 <sub>WT</sub> -mEmerald           | 1-627    | N/A               | pcDNA3.1 | 6       | 6, 7          |
| PLS2 <sub>S5D</sub> -mEmerald          | 1-627    | S5D               | pcDNA3.1 | 6       | 6             |
| PLS2 <sub>S406E</sub> -mEmerald        | 1-627    | S406E             | pcDNA3.1 | 6       | 6, 7          |
| PLS2 <sub>KKEE</sub> -mEmerald         | 1-627    | KK542,545EE       | pcDNA3.1 | 6       | 6             |
| PLS2 <sub>S406E-KKEE</sub> -mEmerald   | 1-627    | SKK406,542,545EEE | pcDNA3.1 | 6       | 6             |
| <b>PLS3</b>                            |          |                   |          |         |               |
| ABD1 <sub>PLS3</sub>                   | 92-389   | N/A               | pColdTEV | 2       |               |
| RD-ABD1 <sub>PLS3</sub>                | 1-389    | N/A               | pColdTEV | 2       |               |
| RD-ABD1 <sub>Q194C</sub>               | 1-389    | CysNull* + Q194C  | pColdTEV | 4       | 4             |
| RD-ABD1 <sub>A216C</sub>               | 1-389    | CysNull* + A216C  | pColdTEV |         | 4             |
| RD-ABD1 <sub>L226C</sub>               | 1-389    | CysNull* + L226C  | pColdTEV |         | 4             |
| RD-ABD1 <sub>G229C</sub>               | 1-389    | CysNull* + G229C  | pColdTEV |         | 4             |
| PLS3 <sub>WT</sub> -mEmerald           | 1-630    | N/A               | pcDNA3.1 | 6       | 6             |
| PLS3 <sub>S409E</sub> -mEmerald        | 1-630    | S409E             | pcDNA3.1 | 6       | 6             |
| PLS3 <sub>L478P</sub> -mEmerald        | 1-630    | L478P             | pcDNA3.1 | 6       | 6             |
| PLS3 <sub>S409E-L478P</sub> -mEmerald  | 1-630    | SL409,478EP       | pcDNA3.1 | 6       | 6             |
| PLS3 <sub>KKEE</sub> -mEmerald         | 1-630    | KK543,545EE       | pcDNA3.1 | 6       | 6             |
| PLS3 <sub>S409E-KKEE</sub> -mEmerald   | 1-630    | SKK409,543,545EEE | pcDNA3.1 | 6       | 6             |

**Supplementary Table 1. PLS constructs used in the present study**

N/A – not applicable.

\* In CysNull PLS3 construct the following nine Cys residues were substituted by Ala: 33, 104, 143, 167, 209, 349, 463, 566, 621.
